# Supplementary material for: New differentially expressed genes and differential DNA methylation underlying refractory epilepsy
Source: PubMed Central journal article supplement (PMC5349997; doi:10.18632/oncotarget.13642), 2016-11-26
Supplement: oncotarget-07-87402-s001.pdf [file oncotarget-07-87402-s001.pdf]

## New differentially expressed genes and differential DNA methylation underlying refractory epilepsy

### SUPPLEMENTARY TABLES

Supplementary Table S1: Brain regions of samples in patients

| Sample | Age | Sex | Region | Onset  | Duration | Event              |
|--------|-----|-----|--------|--------|----------|--------------------|
| 01A    | 21  | m   | RF     | 1y3mon | 20y      | None               |
| 02A    | 23  | m   | LF     | 1y     | 22y      | None               |
| 03A    | 18  | m   | LF     | 3y     | 15y      | None               |
| 04A    | 19  | m   | LP+LO  | 15y    | 4y       | Schizencephaly     |
| 05A    | 21  | m   | LF     | 3y     | 18y      | None               |
| 06A    | 19  | f   | LF     | 4y     | 15y      | None               |
| 07A    | 17  | f   | RT     | 16y    | 1y       | None               |
| 08A    | 16  | f   | LT     | 7y     | 9y       | None               |
| 09A    | 2   | f   | LF     | 0y8mon | 1y4mon   | Viral encephalitis |
| 10A    | 15  | f   | RF     | 14y    | 1y       | None               |

m: male; f: female; RF: right frontal lobep; LF: left frontal lobe; LO: left occipital lobe; RT: right temporal lobe; LT: left temporal lobe; y: year; mon: month.

Supplementary Table S2: Detailed data of methylation reads and peaks

| Sample           | Total Reads | Mapped Reads | Mapping Rate | Unique Mapped Reads | Unique Mapping Rate | Total Peaks | Peak Mean Length | Peak        | Peak |
|------------------|-------------|--------------|--------------|---------------------|---------------------|-------------|------------------|-------------|------|
| 01A <sup>a</sup> | 81,632,654  | 76,963,255   | 94.28        | 58,514,607          | 71.68               | 68,653      | 1350.03          | 92,683,399  | 2.95 |
| 01B <sup>b</sup> | 81,632,654  | 76,610,184   | 93.85        | 58,582,820          | 71.76               | 116,296     | 1385.62          | 161,142,114 | 5.14 |
| 02A              | 81,632,654  | 76,486,214   | 93.7         | 58,402,320          | 71.54               | 108,656     | 1308.16          | 142,139,935 | 4.53 |
| 02B              | 81,632,654  | 77,461,391   | 94.89        | 61,356,385          | 75.16               | 90,698      | 1434.38          | 130,095,769 | 4.15 |
| 03A              | 81,632,654  | 76,970,014   | 94.29        | 59,105,761          | 72.4                | 111,810     | 1334.87          | 149,251,752 | 4.76 |
| 03B              | 81,632,654  | 75,673,881   | 92.7         | 54,559,630          | 66.84               | 146,733     | 1260.35          | 184,935,147 | 5.89 |
| 04A              | 81,632,654  | 76,782,253   | 94.06        | 58,806,391          | 72.04               | 113,738     | 1361.46          | 154,850,004 | 4.94 |
| 04B              | 81,632,654  | 75,848,662   | 92.91        | 59,457,341          | 72.84               | 76,717      | 1468.85          | 112,686,009 | 3.59 |
| 05A              | 81,632,654  | 76,541,735   | 93.76        | 59,970,841          | 73.46               | 100,378     | 1346.18          | 135,126,976 | 4.31 |
| 05B              | 81,632,654  | 76,168,081   | 93.31        | 56,635,996          | 69.38               | 82,841      | 1382.17          | 114,500,711 | 3.65 |
| 06A              | 81,632,654  | 75,265,531   | 92.2         | 55,550,422          | 68.05               | 129,027     | 1324.93          | 170,951,682 | 5.45 |
| 06B              | 81,632,654  | 75,800,909   | 92.86        | 59,366,061          | 72.72               | 104,823     | 1387.47          | 145,439,169 | 4.64 |
| 07A              | 81,632,654  | 75,708,572   | 92.74        | 58,084,418          | 71.15               | 115,136     | 1321.44          | 152,145,268 | 4.85 |
| 07B              | 81,632,654  | 76,845,362   | 94.14        | 61,086,322          | 74.83               | 94,911      | 1370.84          | 130,107,854 | 4.15 |
| 08A              | 81,632,654  | 75,687,929   | 92.72        | 58,408,516          | 71.55               | 126,870     | 1351.64          | 171,482,561 | 5.47 |
| 08B              | 81,632,654  | 73,907,624   | 90.54        | 49,565,816          | 60.72               | 152,299     | 1144.65          | 174,329,761 | 5.56 |
| 09A              | 81,632,654  | 75,278,972   | 92.22        | 53,684,776          | 65.76               | 152,139     | 1249.49          | 190,095,571 | 6.06 |
| 09B              | 81,632,654  | 77,143,624   | 94.5         | 60,349,095          | 73.93               | 114,896     | 1366.86          | 157,046,897 | 5.01 |
| 10A              | 81,632,654  | 76,702,011   | 93.96        | 60,672,708          | 74.32               | 124,874     | 1355.24          | 169,234,750 | 5.39 |
| 10B              | 81,632,654  | 76,072,199   | 93.19        | 56,734,074          | 69.5                | 129,988     | 1313.79          | 170,777,125 | 5.44 |

a: The letter "A" following sample number (for example: 01A) indicates epileptic sample;

b: The letter "B" following sample number (for example: 01B) indicates control, and epileptic samples and controls with the same sample number were taken into pairwise comparison (for example: 01A vs. 01B).

Supplementary Table S3: Detailed data of mRNA-seq

| Sample | Clean reads | Genome map Rate (%) | Gene map Rate (%) | Expressed Gene | Total Reads | Total BasePairs | Total Mapped Reads to Genome | Unique Mapped Read to Genome | Total Mapped Reads to Genes | Unique Mapped Reads to Genes |
|--------|-------------|---------------------|-------------------|----------------|-------------|-----------------|------------------------------|------------------------------|-----------------------------|------------------------------|
| 01A    | 97045478    | 87.50               | 69.08             | 19760          | 97045478    | 8734093020      | 84911012                     | 81158468                     | 67042488                    | 64883639                     |
| 01B    | 76426072    | 87.16               | 66.55             | 19525          | 76426072    | 6878346480      | 66612085                     | 63959980                     | 50862550                    | 49586550                     |
| 02A    | 67036536    | 87.14               | 70.23             | 19307          | 67036536    | 6033288240      | 58414527                     | 56092288                     | 47079916                    | 45855455                     |
| 02B    | 71179770    | 87.67               | 70.61             | 19408          | 71179770    | 6406179300      | 62400479                     | 59609475                     | 50258323                    | 48875774                     |
| 03A    | 85616198    | 87.64               | 71.65             | 19542          | 85616198    | 7705457820      | 75032963                     | 71801918                     | 61342653                    | 59720613                     |
| 03B    | 83436668    | 87.46               | 70.68             | 19312          | 83436668    | 7509300120      | 72972320                     | 70037989                     | 58977153                    | 57442283                     |
| 04A    | 71400528    | 87.42               | 65.75             | 19531          | 71400528    | 6426047520      | 62417677                     | 59862464                     | 46944747                    | 45681925                     |
| 04B    | 66810912    | 87.17               | 66.99             | 19390          | 66810912    | 6012982080      | 58240787                     | 55874950                     | 44754159                    | 43562720                     |
| 05A    | 70686548    | 87.21               | 66.82             | 19379          | 70686548    | 6361789320      | 61645240                     | 59145546                     | 47233078                    | 45984877                     |
| 05B    | 86280644    | 87.74               | 68.23             | 19749          | 86280644    | 7765257960      | 75705119                     | 72671202                     | 58868878                    | 57295502                     |
| 06A    | 71283184    | 86.50               | 68.97             | 19415          | 71283184    | 6415486560      | 61661708                     | 59340207                     | 49167327                    | 47997630                     |
| 06B    | 90615348    | 87.45               | 64.69             | 19533          | 90615348    | 8155381320      | 79246704                     | 75964440                     | 58621129                    | 56926476                     |
| 07A    | 79758516    | 87.09               | 70.14             | 19497          | 79758516    | 7178266440      | 69463682                     | 66576621                     | 55941869                    | 54473654                     |
| 07B    | 78097952    | 87.59               | 68.62             | 19337          | 78097952    | 7028815680      | 68403315                     | 65464826                     | 53591566                    | 52132378                     |
| 08A    | 77022412    | 88.21               | 68.11             | 19406          | 77022412    | 6932017080      | 67944139                     | 65202109                     | 52460165                    | 51056338                     |
| 08B    | 81519066    | 86.78               | 71.91             | 19391          | 81519066    | 7336715940      | 70742023                     | 67897396                     | 58623772                    | 57121102                     |
| 09A    | 79956310    | 86.88               | 69.10             | 19577          | 79956310    | 7196067900      | 69465042                     | 66834685                     | 55246280                    | 53907742                     |
| 09B    | 65975922    | 87.54               | 66.96             | 19422          | 65975922    | 5937832980      | 57753563                     | 55367712                     | 44178044                    | 42983858                     |
| 10A    | 80639798    | 86.73               | 67.28             | 19597          | 80639798    | 7257581820      | 69938224                     | 67286805                     | 54253679                    | 52949995                     |
| 10B    | 91509604    | 87.74               | 63.73             | 19657          | 91509604    | 8235864360      | 80290519                     | 76748079                     | 58316623                    | 56594286                     |

a: The letter "A" following sample number (for example: 01A) indicates epileptic sample;

b: The letter "B" following sample number (for example: 01B) indicates control, and epileptic samples and controls with the same sample number were taken into pairwise comparison (for example: 01A vs. 01B).
